# Supplementary material for: IGF2BP3 stabilizes AGAP2-AS1 through m6A and mediates the miR-9-5p/THBS2/PI3K- Akt pathway to promote macrophage M2 polarization in clear cell renal cell carcinoma
Source: Research Square preprint supplement (doi:10.21203/rs.3.rs-1635879/v1), 2022-05-16
Supplement: Supplementary file 1 [file 8632f2285c972537b91e6fb5.docx]

Supplementary Table 1 **Clinical and pathological features of patients**(n=50)

| No. | Age | Sex | Pathologic Diagnosis | pT Stage | Fuhrman Grade |
| --- | --- | --- | --- | --- | --- |
| 1 | 55 | male | clear cell | T1b | Ⅱ |
| 2 | 73 | male | clear cell | T4 | Ⅲ |
| 3 | 55 | male | clear cell | T2a | Ⅱ |
| 4 | 36 | male | clear cell | T1a | Ⅰ |
| 5 | 49 | female | clear cell | T2a | Ⅰ |
| 6 | 55 | male | clear cell | T3a | Ⅱ |
| 7 | 59 | female | clear cell | T1b | Ⅰ |
| 8 | 68 | female | clear cell | T3a | Ⅱ |
| 9 | 74 | male | clear cell | T1b | Ⅰ |
| 10 | 62 | male | clear cell | T1b | Ⅱ |
| 11 | 75 | male | clear cell | T1a | Ⅰ |
| 12 | 43 | male | clear cell | T1a | Ⅰ |
| 13 | 59 | male | clear cell | T3b | Ⅲ |
| 14 | 58 | female | clear cell | T1b | Ⅰ |
| 15 | 54 | female | clear cell | T3a | Ⅰ |
| 16 | 60 | male | clear cell | T4 | Ⅱ |
| 17 | 63 | female | clear cell | T1b | Ⅱ |
| 18 | 65 | female | clear cell | T1b | Ⅰ |
| 19 | 54 | male | clear cell | T3a | Ⅱ |
| 20 | 57 | male | clear cell | T1a | Ⅰ |
| 21 | 56 | male | clear cell | T2a | Ⅲ |
| 22 | 53 | female | clear cell | T1b | Ⅰ |
| 23 | 67 | male | clear cell | T2a | Ⅰ |
| 24  25 | 51  56 | female  male | clear cell  clear cell | T1b  T1b | Ⅱ  Ⅰ |
| 26 | 59 | female | clear cell | T1b | Ⅰ |
| 27 | 68 | female | clear cell | T3a | Ⅱ |
| 28 | 74 | male | clear cell | T1b | Ⅰ |
| 29 | 62 | male | clear cell | T1b | Ⅱ |
| 30 | 75 | male | clear cell | T1a | Ⅰ |
| 31 | 43 | male | clear cell | T1a | Ⅰ |
| 32 | 59 | male | clear cell | T3b | Ⅲ |
| 33 | 58 | female | clear cell | T1b | Ⅰ |
| 34 | 54 | female | clear cell | T3a | Ⅰ |
| 35 | 60 | male | clear cell | T4 | Ⅱ |
| 36 | 63 | female | clear cell | T1b | Ⅱ |
| 37 | 65 | female | clear cell | T1b | Ⅰ |
| 38 | 55 | male | clear cell | T3a | Ⅱ |
| 39 | 59 | female | clear cell | T1b | Ⅰ |
| 40 | 68 | female | clear cell | T3a | Ⅱ |
| 41 | 74 | male | clear cell | T1b | Ⅰ |
| 42 | 62 | male | clear cell | T1b | Ⅱ |
| 43 | 62 | male | clear cell | T1b | Ⅱ |
| 44 | 75 | male | clear cell | T1a | Ⅰ |
| 45 | 65 | male | clear cell | T1b | Ⅰ |
| 46  47  48  49  50 | 54  62  47  52  60 | male  female  female  male  male | clear cell  clear cell  clear cell  clear cell  clear cell | T1b  T1a  T3b  T3a  T1b | Ⅰ  Ⅱ  Ⅲ  Ⅰ  Ⅰ |

Supplementary Table 2 **RT-Qpcr Primer sequence**

| Primers | **Sequence(**5'-3'**)** |
| --- | --- |
| GAPDH | F：CCACATCGCTCAGACACCAT |
| AGAP2-AS1    miR-9-5p  IGF2BP3  iNOS  TNF-α  Arg-1  IL-10  U6 | R：CCAGGCGCCCAATACG  F：TACCTTGACCTTGCTGCTCTC  R：TGTCCCTTAATGACCCCATCC  F：ACACTCCAGCTGGGAGTATGTCGATCTATTG  R：TGGTGTCGTGGAGTCG  F：AGTTGTTGTCCCTCGTGACC  R：GTCCACTTTGCAGAGCCTTC  F：GCAGAATGTGACCATCATGG  R：ACAACCTTGGTGTTGAAGGC  F：ATGTCTCAGCCTCTTCTCATTC  R：GCTTGTCACTCGAATTTTGAGA  F：CATATCTGCCAAAGACATCGTG  R：GACATCAAAGCTCAGGTGAATC  F：TGCTAACCGACTCCTTAATGCAGGAC  R：CCTTGATTTCTGGGCCATGCTTCTC  F：CTCGCTTCGGCAGCACA  R：CGTCAAAGGTGGAGGAGTGG |
